# Supplementary material for: Analysis of Faecal Microbiota and Small ncRNAs in Autism: Detection of miRNAs and piRNAs with Possible Implications in Host–Gut Microbiota Cross-Talk
Source: MDPI journal article supplement (doi:10.3390/nu14071340), 2022-03-23
Supplement: s1 [file s1]

# Analysis of faecal microbiome and small ncRNAs in autism: detection of miRNAs and piRNAs with possible implications in host-gut microbiota cross talk

Federica Chiappori<sup>†</sup>, Francesca Anna Cupaioli<sup>†</sup>, Arianna Consiglio, Noemi Di Nanni, Ettore Mosca, Vito Flavio Licciulli, and Alessandra Mezzelani\*

Supplementary Figure

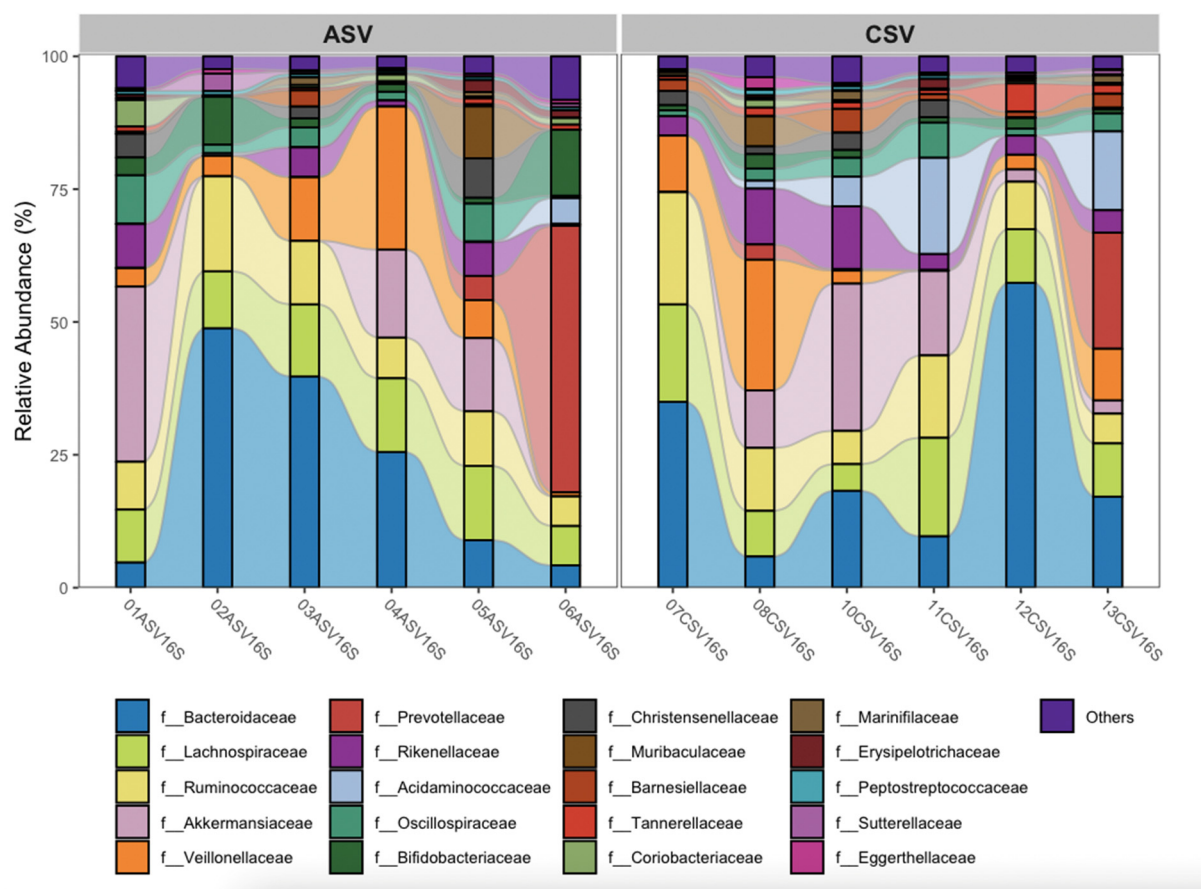

**Supplementary Figure S1.** Relative abundances of 16S families. This figure represents the high variability among the samples. ASV is referred to ASD; CSV is referred to Ctrl.

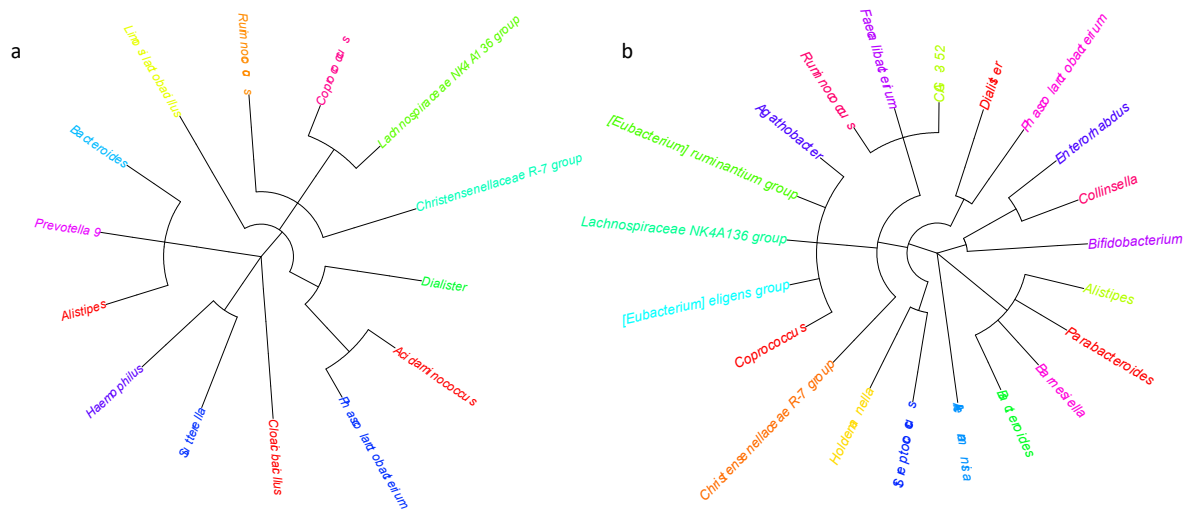

**Supplementary Figure S2.** Dendrograms of identified bacteria in ASD (a) and Ctrl (b) samples.

### **Supplementary tables caption**

**Supplementary table S1.** 16S identified in faeces samples. Differential analysis was performed comparing ASD samples to the entire controls set (n=6).

**Supplementary table S2.** 18S identified in faeces samples. Differential analysis was performed comparing ASD samples to the entire controls set (n=6).

**Supplementary table S3.** sncRNAs identified in faeces samples. Differential analysis was performed comparing ASD samples to the entire controls set (n=6). sncRNAs with FDR < 0.05 were reported.

**Supplementary table S4.** sncRNAs identified in the two couples of siblings. Differential analysis was performed for each couple. sncRNAs with FDR < 0.05 were reported.
